# Supplementary material for: ALK inhibitor resistance in ALKF1174L-driven neuroblastoma is associated with AXL activation and induction of EMT
Source: Springer Nature journal article supplement (doi:10.1038/onc.2015.434), 2015-11-30
Supplement: 41388_2016_BFonc2015434_MOESM33_ESM.pdf [file 41388_2016_BFonc2015434_MOESM33_ESM.pdf]

## Supplementary Figures

**Supplementary Figure S1.** Development of TAE684-resistance in ALK-mutated SH-SY5Y NB cells. **(a)** Dose-response curves for parental SH-SY5Y and SY5Y-TR cells (mixed population), maintained in 250 nM of TAE684 or in drug-free media for 10 passages (SY5Y-TR-ND), treated with increasing concentrations of TAE684 for 3 days. The results represent the mean  $\pm$  SD of three separate experiments. **(b)** Immunoblot analysis of total and pALK and its indicated downstream signaling molecules in parental SH-SY5Y and TAE684-resistant SY5Y-TR cells.

**Supplementary Figure S2.** Development of TAE684-resistance in ALK-mutated SK-N-SH cells. **(a)** Dose-response curves for parental and TAE684-resistant SK-N-SH (SK-N-SH-TAE-R) cells treated with TAE684 for 3 days [ $IC_{50}$  = SK-N-SH, 35 nM; SK-N-SH TAE, 102 nM]. **(b)** Western blot analysis of total and pALK, AXL and ERK proteins in TAE684-sensitive and resistant SK-N-SH cells. **(c)** Dose-response curves for parental and SK-N-SH-TAE-R cells treated with R428 for 3 days [ $IC_{50}$  = SK-N-SH, 865 nM; SK-N-SH TAE, 448 nM].

**Supplementary Figure S3.** Analysis of AXL activation in TAE684-resistant SY5Y-TR1 cells. **(a)** Quantitative PCR analysis of genomic *AXL* levels in SH-SY5Y and SY5Y-TR1 cells. DNA was isolated from cells using QIAamp DNA mini kit (Qiagen) and qPCR performed as described in the Materials and Methods. **(b)** qRT-PCR analysis of the indicated miRNAs in SH-SY5Y and SY5Y-TR1 cells. Total RNA was extracted using Trizol and the miScript PCR system kit (Qiagen) was used for qRT-PCR. The results are expressed as mean  $\pm$  SD of three separate experiments \*\*\* $P$ <0.001. **(c)** qRT-PCR analysis of miRNA-199b and *AXL*, following the exogenous expression of miR-199b mimic (Sigma Aldrich) in resistant SY5Y-TR1 cells. Hsa-miR-199b mimics (50 nM) were transfected as described in the Materials and Methods.

The results are expressed as mean  $\pm$  SD of three separate experiments  $***P<0.001$ . (d) Western blot analysis of AXL and total and pERK levels in TAE684-resistant cells in which miRNA-199b was overexpressed at increasing doses and for varying times.

**Supplementary Figure S4.** GAS6 upregulation leads to AXL protein stabilization. (a) qRT-PCR analysis of AXL expression levels in parental SH-SY5Y cells overexpressing AXL, and treated with three different concentrations (100, 200, 400ng/mL) of recombinant human GAS6. Untreated (U) SH-SY5Y cells were used as a reference. The results are expressed as mean  $\pm$  SD of three separate experiments.  $***P<0.001$ . (b) Immunoblot analysis of total AXL levels in AXL-overexpressing SH-SY5Y cells pretreated with rGAS6 (400ng/mL) for 3 days, and then exposed to 200uM of the protein synthesis inhibitor cycloheximide (CHX) for the indicated times.
